# Supplementary material
Source: publisher site journal article supplement (https://www.dovepress.com/article/436160)
Supplement: Supplementary file 1 [file get_supplementary_file.php]

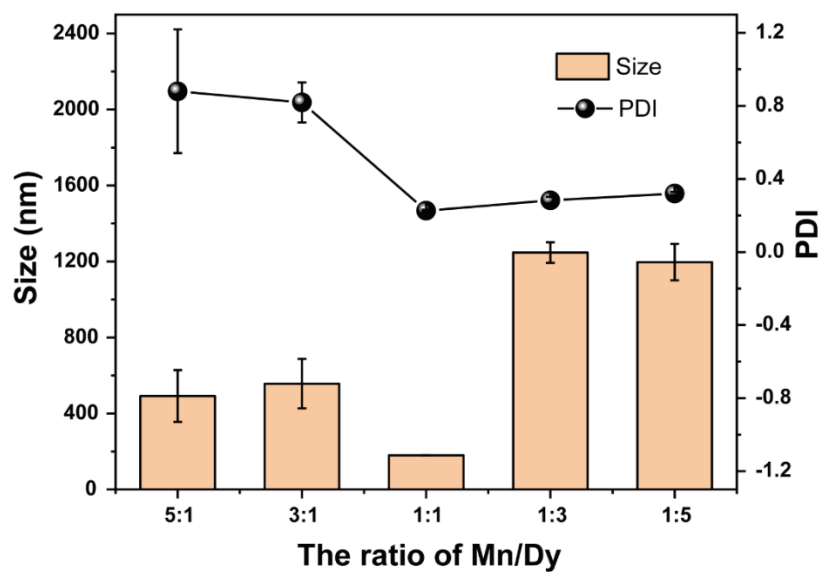

**Figure S1** The variation size and the PDI of NPs under different ratio between Mn ions and Dy ions.

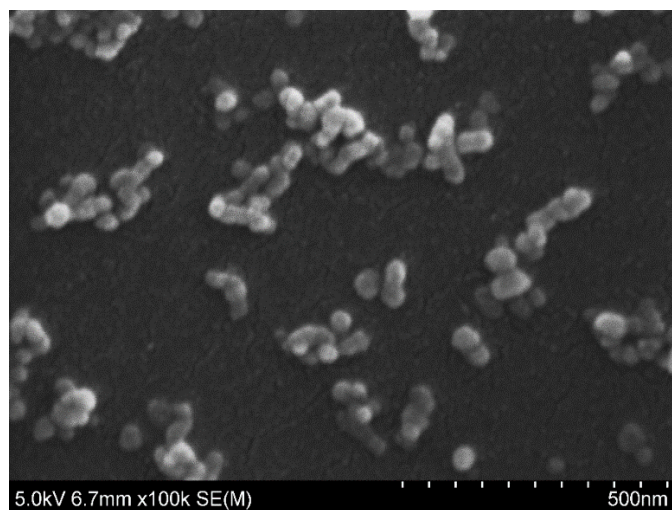

**Figure S2** SEM image of Dy/Mn-P. Scale bar = 500 nm.

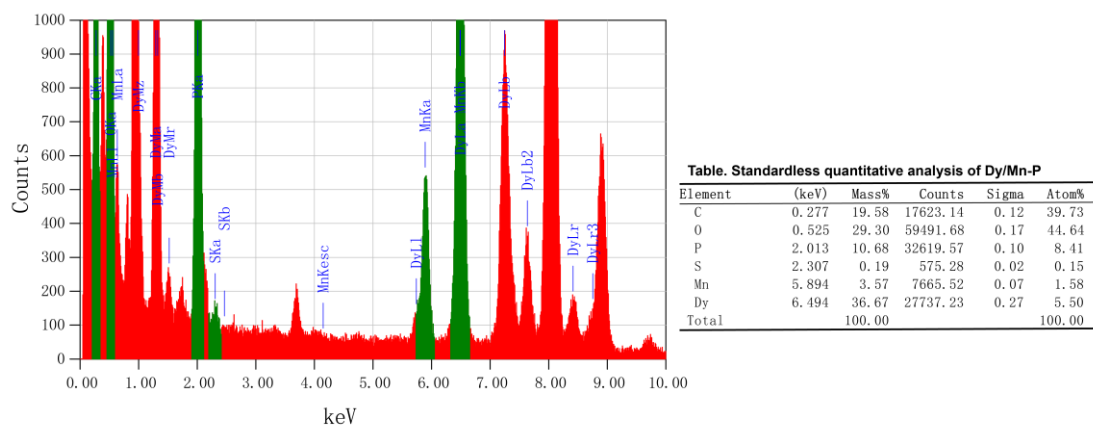

**Figure S3** EDS spectrum of Dy/Mn-P.

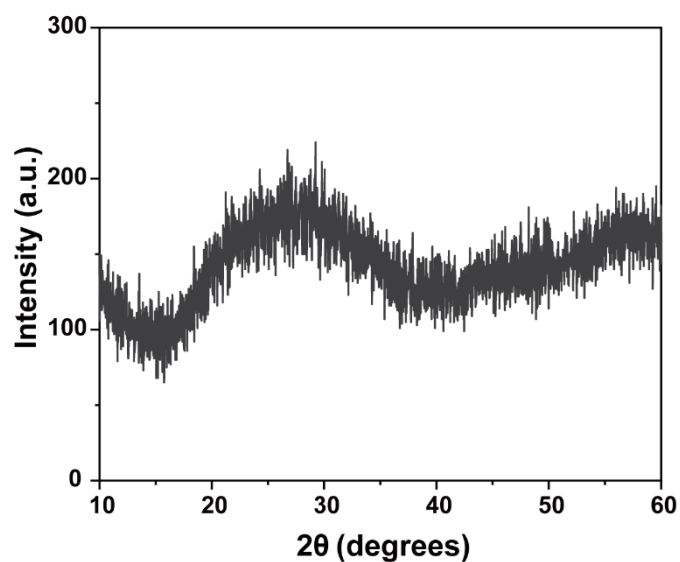

**Figure S4** XRD pattern of Dy/Mn-P.

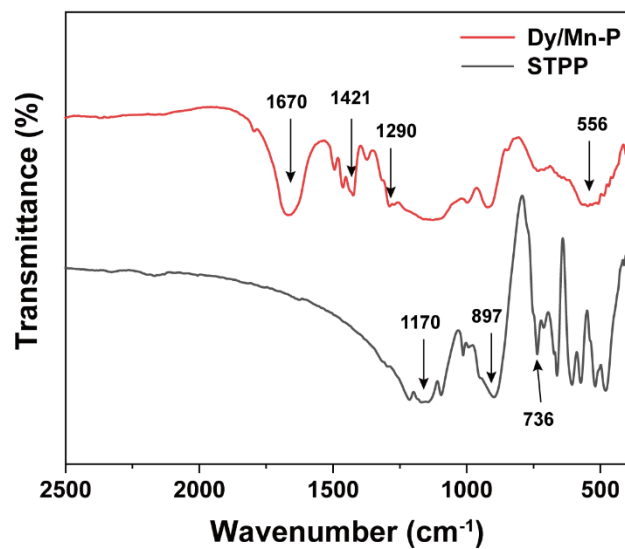

**Figure S5** FTIR spectra of Dy/Mn-P and STPP.

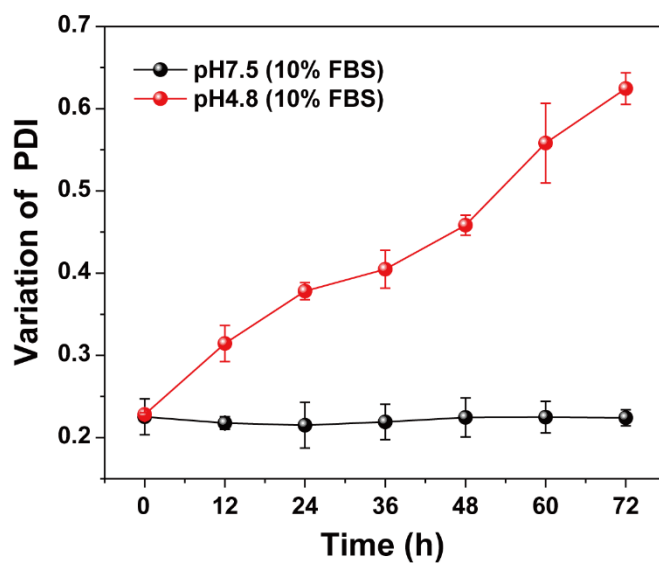

**Figure S6** The PDI variation of Dy/Mn-P in 10% FBS in different pH value solution at various time points.

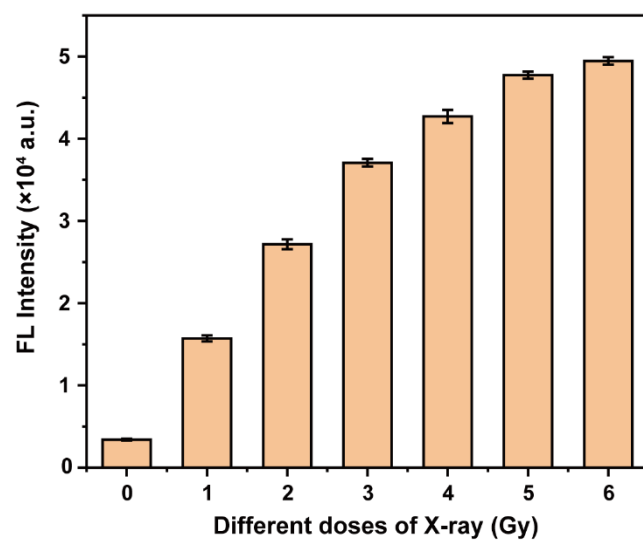

**Figure S7** Quantification of generation of  $^1\text{O}_2$  induced by Dy/Mn-P at different irradiation doses.

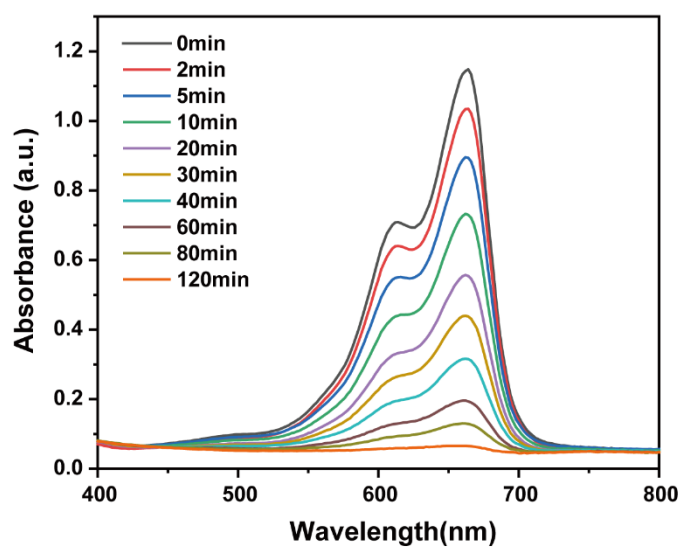

**Figure S8** Absorbance spectra changes of MB under different times.

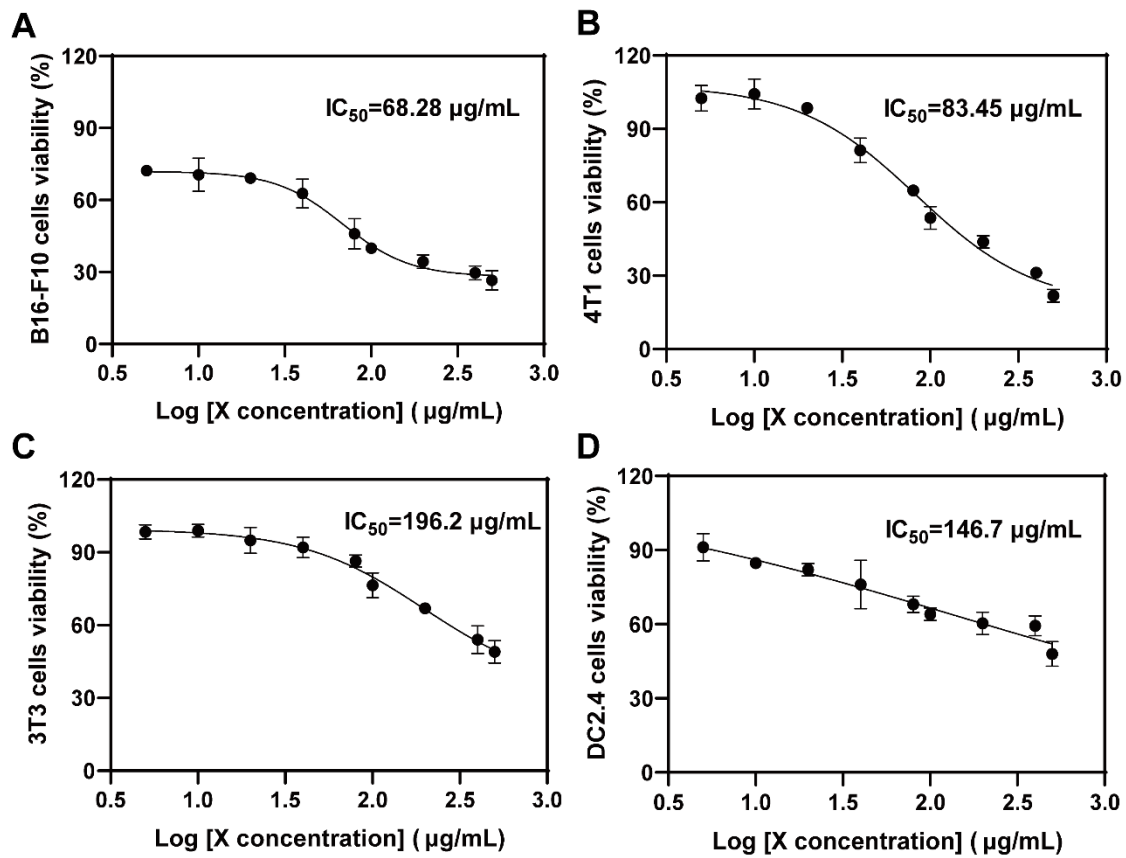

**Figure S9** (A-D) The calculation of  $IC_{50}$  for B16-F10 cells, 4T1 cells, 3T3 cells, and DC2.4 cells, respectively.
